# Supplementary material
Source: PubMed Central journal article supplement (PMC1820670)

**a**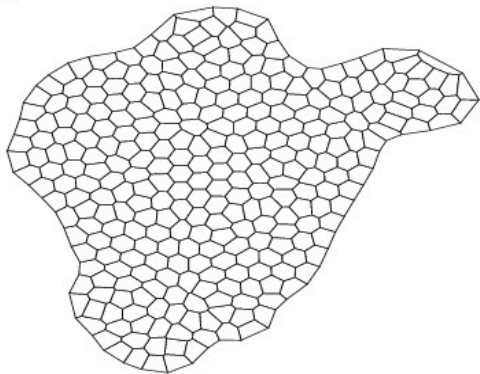**b**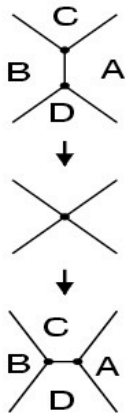

Supplement: pnas_0607134104_1.pdf [file pnas_0607134104_1.pdf]

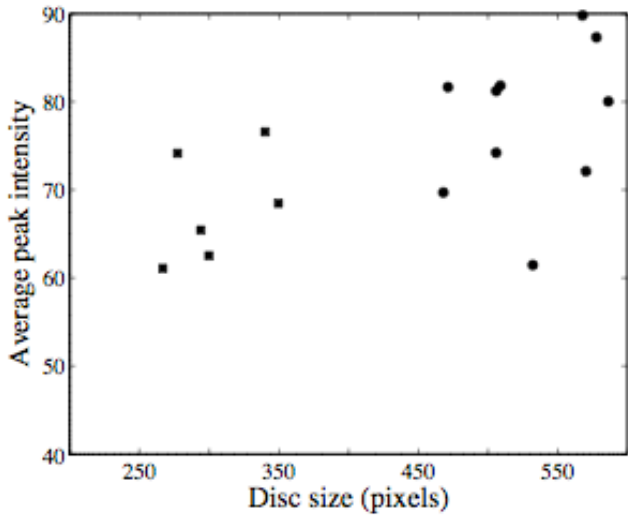

Supplement: pnas_0607134104_2.pdf [file pnas_0607134104_2.pdf]

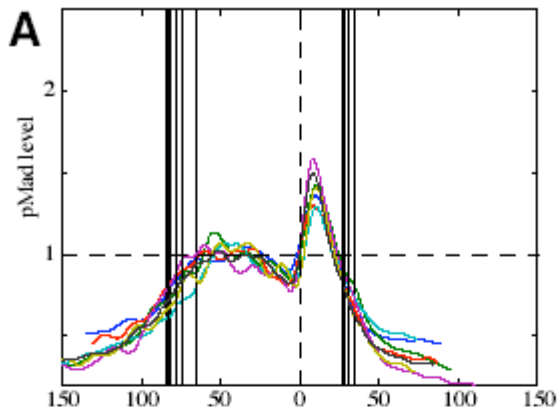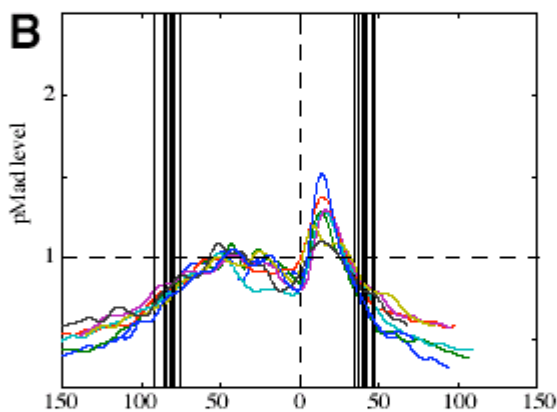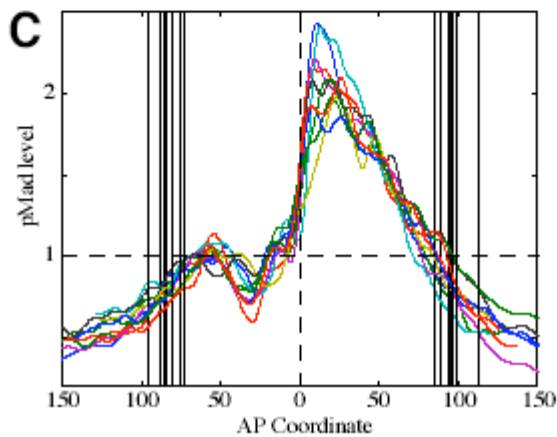

Supplement: pnas_0607134104_3.pdf [file pnas_0607134104_3.pdf]
